# Supplementary material for: Microfluidics on Stretchable Strings
Source: bioRxiv or medRxiv preprint supplement (doi:10.1101/2023.03.02.530606), 2023-03-02
Supplement: Supplementary file [file media-1.pdf]

## **Microfluidics on Stretchable Strings**

Philippe DeCorwin-Martin<sup>1</sup>, Andy Ng<sup>1</sup> and David Juncker<sup>1\*</sup>

1. Biomedical Engineering Department and McGill Genome Centre, McGill University,  
Montreal, Quebec, Canada

\*Corresponding author email address: david.juncker@mcgill.ca

### **Supporting Information**

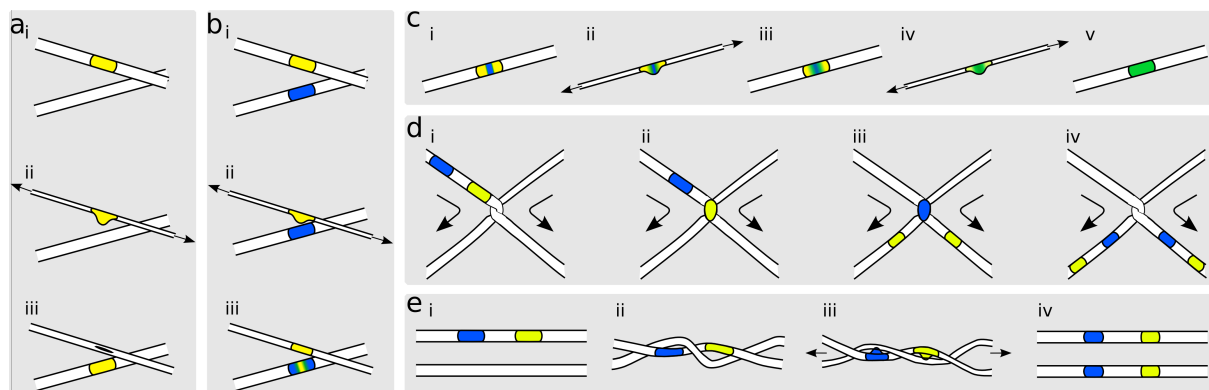

**Figure S1.** Schematic of the five basic principles and fluidic functions realized by SMs. One-way transfer of reagents from donor to receiver string with (a) an empty and (b) a pre-loaded receiver string. (c) Active, rapid mixing of two reagents by cyclic stretching. Rapid copying of reagents from a string to one or multiple other strings by (d) sliding and (e) twisting and stretching.
